# Supplementary material for: Swinepox Virus Strains Isolated from Domestic Pigs and Wild Boar in Germany Display Altered Coding Capacity in the Terminal Genome Region Encoding for Species-Specific Genes
Source: MDPI journal article supplement (doi:10.3390/v13102038), 2021-10-09
Supplement: s1 [file s1]

*Supplementary Materials*

# Swinepox Virus Strains Isolated from Domestic Pigs and Wild Boar in Germany Display Altered Coding Capacity in the Terminal Genome Region Encoding for Species-Specific Genes

| SWPV strains              | NC003389<br>SWPV/USA | MZ773481<br>SWPV/domestic | MZ773480<br>SWPV/wildboar | MW036632<br>SWPV/India |
|---------------------------|----------------------|---------------------------|---------------------------|------------------------|
| NC003389<br>SWPV/USA      | 100%                 | 99.940%                   | 99.922%                   | 98.149%                |
| MZ773481<br>SWPV/domestic | 99.940%              | 100%                      | 99.924%                   | 98.146%                |
| MZ773480<br>SWPV/wildboar | 99.922%              | 99.924%                   | 100%                      | 98.140%                |
| MW036632<br>SWPV/India    | 98.149%              | 98.146%                   | 98.140%                   | 100%                   |

Figure S1. Nucleotide identity matrix comparison for swinepox virus (SWPV) strains

**Table S1.** Nucleotide and amino acid changes between the untranslated regions (white background) and genes (pale blue background) of different SWPV strains

| Gene                                    |                                        |                                     | nt and aa Changes Compared to SWPV /Domestic Pig/USA/2002 (NC_003389) |                                    | nt and Amino Acid Changes Compared to SWPV/Domestic pig/GER/2019 (MZ773481) |
|-----------------------------------------|----------------------------------------|-------------------------------------|-----------------------------------------------------------------------|------------------------------------|-----------------------------------------------------------------------------|
| SWPV /Domestic Pig/USA/2002 (NC_003389) | SWPV/ Domestic Pig/GER/2019 (MZ773481) | SWPV/Wild Boar/GER/ 2019 (MZ773480) | SWPV/Domestic Pig/GER/2019 (MZ773481)                                 | SWPV/Wild Boar/GER/2019 (MZ773480) | SWPV/Wild Boar/GER/2019 (MZ773480)                                          |
| U                                       | U                                      | U                                   |                                                                       | 38T>C                              | 38T>C                                                                       |
|                                         |                                        |                                     |                                                                       | 108A>G                             | 108A>G                                                                      |
|                                         |                                        |                                     | 163insT                                                               | 163insT                            |                                                                             |
|                                         |                                        |                                     | 238insT                                                               | 238insT                            |                                                                             |
| SPV001                                  | SPVdp001                               | SPVwb001                            |                                                                       | 607C>T (Y10D)                      | 607C>T (Y10D)                                                               |
|                                         |                                        |                                     | 710C>A                                                                |                                    | 711A>C                                                                      |
| U                                       |                                        |                                     | 792del                                                                |                                    | 793insT                                                                     |
| SVP002                                  | SPVdp002                               | SPVwb002                            |                                                                       | 983A>C (Y111D)                     | 995A>C (Y111D)                                                              |
|                                         |                                        |                                     |                                                                       | 984T>C (Y111D)                     | 996T>C (Y111D)                                                              |
| U                                       |                                        |                                     |                                                                       | 1327insA                           | 1327insA                                                                    |
| SVP004                                  | SPVdp004                               | SPVwb004                            | 2546C>T (R76K)                                                        | 2549C>T (R76K)                     |                                                                             |
|                                         |                                        |                                     |                                                                       | 2663G>A (A38V)                     | 2663G>A (A38V)                                                              |
| SVP006                                  | SPVdp006                               | SPVwb006                            | 5091T>G                                                               | 5094T>G                            |                                                                             |
| SVP008                                  | SPVdp008                               | SPVwb008                            | 6122T>C (N255S)                                                       | 6125T>C (N255S)                    |                                                                             |
|                                         |                                        |                                     |                                                                       | 6571T>C                            | 6571T>C                                                                     |
|                                         |                                        |                                     |                                                                       | 6582G>T (Q103K)                    | 6582G>T (Q103K)                                                             |
|                                         |                                        |                                     |                                                                       | 6588T>C (I101V)                    | 6588T>C (I101V)                                                             |
| SVP009                                  | SPVdp009                               | SPVwb009                            | 6958G>T (S143Y)                                                       |                                    | 6961T>G (Y143S)                                                             |
|                                         |                                        |                                     | 7040C>T (V116I)                                                       | 7043C>T (V116I)                    |                                                                             |
| U                                       |                                        |                                     | 8151insA                                                              |                                    | 8154del                                                                     |
| SVP016                                  | SPVdp016                               | SPVwb016                            | 11878C>T (M123I)                                                      |                                    | 11878C>T (M123I)                                                            |
| SVP017                                  | SPVdp017                               | SPVwb017                            | 12472G>A (T20I)                                                       |                                    | 12474A>G (I20T)                                                             |
| SVP020                                  | SPVdp020                               | SPVwb020-019                        |                                                                       | 13061del (fusion of SPV019/SPV020) | 13061del (fusion of SPV019/SPV020)                                          |
| U                                       |                                        |                                     | 13175del 5nts                                                         |                                    | 13157ins 5nts                                                               |
| U                                       | SPVdp020a                              | U                                   | 13424del (new ORF)                                                    |                                    | 13426ins (truncation of ORF SPVdp021)                                       |
| U                                       |                                        |                                     | 13475del 11nts                                                        |                                    | 13486ins 11nts                                                              |
| SPV021                                  | SPVdp021                               | SPVwb021                            | 13524T>C (K206R)                                                      |                                    | 13542C>T (R206K)                                                            |
| SPV024                                  | SPVdp024                               | SPVwb024                            | 17243A>C (F424L)                                                      | 17261A>C (F424L)                   |                                                                             |
|                                         |                                        |                                     |                                                                       | 18392T>C                           | 18392T>C                                                                    |
| U                                       |                                        |                                     | 19670del                                                              |                                    | 19688insT                                                                   |
| SPV028                                  | SPVdp028                               | SPVwb028                            | 21239T>C (E19G)                                                       |                                    | 21258C>T (G19E)                                                             |
| U                                       |                                        |                                     | 23082insT                                                             | 23101insT                          |                                                                             |
|                                         |                                        |                                     |                                                                       | 23110T>C                           | 23110T>C                                                                    |
| SPV033                                  | SPVdp033                               | SPVwb033                            | 26495G>T (Q21K)                                                       |                                    | 26495G>T (Q21K)                                                             |
| SPV035                                  | SPVdp035                               | SPVwb035                            | 28529G>T (A53S)                                                       |                                    | 28529G>T (A53S)                                                             |
| SPV036                                  | SPVdp036                               | SPVwb036                            | 30879C>T                                                              |                                    | 30898C>T                                                                    |

|        |          |          |          |                     |                     |
|--------|----------|----------|----------|---------------------|---------------------|
| SPV037 | SPVdp037 | SPVwb037 |          | 32515del            | 32515del            |
|        | U        |          |          | 32546insA           | 32546insA           |
| SPV038 | SPVdp038 | SPVwb038 |          | 33378C>T (A405T)    | 33378C>T (A405T)    |
| SPV042 | SPVdp042 | SPVwb042 |          | 37366G>A<br>(A560V) | 37366G>A (A560V)    |
|        |          |          |          | 38637T>C            | 38637T>C            |
|        |          |          |          | 38632C>T (D132N)    | 38651C>T (D132N)    |
| SPV044 | SPVdp044 | SPVwb044 |          | 39759T>C            | 39778C>T            |
| SPV046 | SPVdp046 | SPVwb046 |          | 42213A>G (I145V)    | 42232A>G (I145V)    |
| SPV047 | SPVdp047 | SPVwb047 | 43949T>C | 43968T>C            |                     |
|        |          |          |          | 44460G>A            | 44460G>A            |
| SPV055 | SPVdp055 | SPVwb055 |          | 50246A>C (Y30S)     | 50265A>C (Y30S)     |
| SPV059 | SPVdp059 | SPVwb059 |          | 53332T>C            | 53351T>C            |
| SPV061 | SPVdp061 | SPVwb061 |          | 54988T>C (S61P)     | 55007T>C (S61P)     |
| SPV063 | SPVdp063 | SPVwb063 | 56151C>G | 56020A>G            | 56020A>G            |
|        |          |          |          | 56170C>G            |                     |
| SPV064 | SPVdp064 | SPVwb064 |          | 56350G>A (V48M)     | 56369A>G (M48V)     |
|        |          |          |          | 56586T>C            | 56605T>C            |
|        |          |          |          | 56667A>C            | 56686A>C            |
| SPV068 | SPVdp068 | SPVwb068 |          | 60143G>A (V460I)    | 60162G>A (V460I)    |
|        |          |          |          | 60433A>T            | 60452A>T            |
|        |          |          |          | 60697G>T (E644D)    | 60716T>G (D644E)    |
| SPV072 | SPVdp072 | SPVwb072 |          | 65222G>A            | 65241G>A            |
| SPV076 | SPVdp076 | SPVwb076 |          | 69877T>C            | 69877T>C            |
| SPV077 | SPVdp077 | SPVwb077 |          | 72157T>C            | 72176C>T            |
| SPV079 | SPVdp079 | SPVwb079 |          | 73255A>G            | 73255A>G            |
| SPV083 | SPVdp083 | SPVwb083 |          | 78742C>A (P78Q)     | 78742C>A (P78Q)     |
| SPV085 | SPVdp085 | SPVwb085 |          | 79979A>G (M591T)    | 79998A>G<br>(M591T) |
|        |          |          |          | 79984T>C            | 80003C>T            |
|        |          |          |          |                     | 80255T>G            |
|        |          |          |          | 80692G>T            | 80711T>G            |
| SPV087 | SPVdp087 | SPVwb087 |          | 83187G>A            | 83206G>A            |
|        |          |          |          | 83411C>T (A302T)    | 83430C>T (A302T)    |
|        |          |          |          | 83840C>T (V159I)    | 83859C>T (V159I)    |
| SPV092 | SPVdp092 | SPVwb092 |          | 87971A>G (C82R)     | 87990G>A (R82C)     |
|        |          |          |          | 88114T>C            | 88114T>C            |
| SPV095 | SPVdp095 | SPVwb095 |          | 91653T>C (S123G)    | 91672T>C (S123G)    |
| SPV098 | SPVdp098 | SPVwb098 |          | 94691G>C            | 94691G>C            |
|        |          |          |          | 95250G>T (Q226K)    | 95269T>G (K226Q)    |
|        |          |          |          | 95647T>A            | 95666T>A            |
| SPV105 | SPVdp105 | SPVwb105 |          | 98642C>T            | 98661C>T            |
| SPV109 | SPVdp109 | SPVwb109 |          | 102690A>G (N173S)   | 102709G>A (S173N)   |
|        |          |          |          | 102812T>C           | 102812T>C           |
|        |          |          |          | 103274A>G           | 103274A>G           |
| SPV111 | SPVdp111 | SPVwb111 |          | 103655C>A           | 103674A>C           |
| SPV112 | SPVdp112 | SPVwb112 |          | 104067A>C (K35N)    | 104086A>C<br>(K35N) |
|        |          |          |          | 104130C>A           | 104149A>C           |

|        |          |          |                      |                                                      |                                           |
|--------|----------|----------|----------------------|------------------------------------------------------|-------------------------------------------|
| SPV113 | SPVdp113 | SPVwb113 | 106622T>G (Y504D)    | 106641T>G (Y504D)                                    |                                           |
|        |          |          | 106772A>C            | 106791A>C                                            |                                           |
| SPV115 | SPVdp115 | SPVwb115 | 109299T>G            | 109318T>G                                            |                                           |
| SPV116 | SPVdp116 | SPVwb116 |                      | 110234A>G                                            | 110234A>G                                 |
|        | U        |          |                      | 111576del 11nts                                      | 111576del 11nts                           |
| SPV122 | SPVdp122 | SPVwb122 | 113733G>A (A137T)    | 113741G>A (A137T)                                    |                                           |
| SPV123 | SPVdp123 | SPVwb123 | 114503T>C            | 114511T>C                                            |                                           |
| SPV126 | SPVdp126 | SPVwb126 |                      | 117094T>A (K101I)                                    | 117094T>A (K101I)                         |
|        |          |          |                      | 117103del 6nts (N106-107del)                         | 117103del 6nts (N106-107del)              |
| SPV131 | SPVdp131 | SPVwb131 | 120915ins 3nts (22I) | 120917ins 3nts (22I)                                 |                                           |
|        |          |          | 121393C>T            | 121395C>T                                            |                                           |
|        |          |          | 121887A>G            |                                                      | 121889G>A                                 |
|        |          |          | 123410A>G            |                                                      | 123412G>A                                 |
|        |          |          |                      | 123741G>A                                            | 123741G>A                                 |
|        |          |          | 124213T>C            | 124215T>C                                            |                                           |
|        |          |          | 124544G>A (V1231I)   | 124546G>A (V1231I)                                   |                                           |
|        |          |          | 124979G>A (V1376I)   | 124981G>A (V1376I)                                   |                                           |
|        |          |          |                      | 125128G>A (D1425N)                                   | 125128G>A (D1425N)                        |
|        |          |          |                      | 126256C>A (H1801N)                                   | 126256C>A (H1801N)                        |
| SPV132 | SPVdp132 | SPVwb132 | 127438A>C (H242P)    | 127440A>C (H242P)                                    |                                           |
|        |          |          | 127656T>C (Y315H)    | 127658T>C (Y315H)                                    |                                           |
| SPV134 | SPVdp134 | SPVwb134 |                      | 128978C>A                                            | 128978C>A                                 |
| SPV136 | SPVdp136 | SPVwb136 |                      | 130126T>C                                            | 130126T>C                                 |
| SPV139 | SPVdp139 | SPVwb139 |                      | 133889C>A                                            | 133889C>A                                 |
| SPV141 | SPVdp141 | SPVwb141 | 136344C>A            |                                                      | 136346A>C                                 |
|        | U        |          | 139973insT           | 137036del;<br>137079C>T;<br>138626del;<br>139973insT | 137036del;<br>137079C>T; 138626del        |
| SPV144 | SPVdp144 | SPVwb144 |                      | 140046T>C (V19A)                                     | 140046T>C (V19A)                          |
|        | U        |          | 142452insA           |                                                      | 142454del                                 |
| SPV146 | SPVdp146 | SPVwb146 | 142606C>T            |                                                      | 142605T>C                                 |
| SPV147 | SPVdp147 | SPVwb147 |                      | 143783C>T (A38V)                                     | 143783C>T (A38V)                          |
|        |          |          | 143898G>A (R76K)     | 143897G>A (R76K)                                     |                                           |
|        | U        | SPVwb149 |                      | 145110insT (+8 amino acids at gene start)            | 145110insT (+8 amino acids at gene start) |
| SPV149 | SPVdp149 | SPVwb149 |                      | 145450A>G (Y111D)                                    | 145450A>G (Y111D)                         |

|        |          |          |                      |                   |
|--------|----------|----------|----------------------|-------------------|
|        |          |          | 145451T>G<br>(Y111D) | 145451T>G (Y111D) |
| U      |          |          | 145643del            | 145644insA        |
| SPV150 | SPVdp150 | SPVwb150 | 145734G>T (D10Y)     | 145735T>G (Y10D)  |
|        |          |          | 145839G>A            | 145839G>A         |
|        |          |          | 146201insA           | 146201insA        |
| U      |          |          | 146275insA           | 146277insA        |
|        |          |          | 146338T>C            | 146338T>C         |
|        |          |          | 146408A>G            | 146408A>G         |
